# Supplementary material for: Laser-induced deposition of Ni, Co-doped FeOOH cocatalysts on WO3 photoanodes and elucidating their roles in water oxidation in terms of carrier dynamics
Source: Royal Society of Chemistry journal article supplement (doi:10.1039/d2ta07004a), 2023-01-01
Supplement: d2ta07004a1.pdf [file d2ta07004a1.pdf]

*Supporting Information*

**Laser-Induced Deposition of Ni, Co-doped FeOOH Cocatalysts on  
WO<sub>3</sub> Photoanodes and Elucidating Their Roles in Water Oxidation  
in Terms of Carrier Dynamics**

*Hee Yeong Kim<sup>1, †</sup>, Heejung Kong<sup>2, †, Δ</sup>, Jong Hwa Kim<sup>3</sup>, Won-Geun Yang<sup>3</sup>, Hyein Lee<sup>4</sup>,  
Seonmi Ko<sup>2</sup>, Hee Jin Lee<sup>2</sup>, Guangxia Piao<sup>5</sup>, Hyunwoong Park<sup>5</sup>, Weon-Sik Chae<sup>3, \*</sup>, and  
Junyeob Yeo<sup>1, 2, \*</sup>*

<sup>1</sup> Department of Hydrogen & Renewable Energy, Kyungpook National University, Daegu 41566, Republic of Korea

<sup>2</sup> Novel Applied Nano Optics (NANO) Lab., Department of Physics, Kyungpook National University, Daegu 41566, Republic of Korea

<sup>3</sup> Daegu Center, Korea Basic Science Institute, Daegu 41566, Republic of Korea

<sup>4</sup> KNU Instrumental Analysis Center, Kyungpook National University, Daegu 41566, Republic of Korea

<sup>5</sup> School of Energy Engineering, Kyungpook National University, Daegu 41566, Republic of Korea

† These authors contributed equally to this work.

Δ Current address: Institute for Solar Fuels, Helmholtz-Zentrum Berlin für Materialien und Energie GmbH, 14109 Berlin, Germany

\* Corresponding authors

W.-S Chae: [wschae@kbsi.re.kr](mailto:wschae@kbsi.re.kr)

J. Yeo: [junyeob@knu.ac.kr](mailto:junyeob@knu.ac.kr)

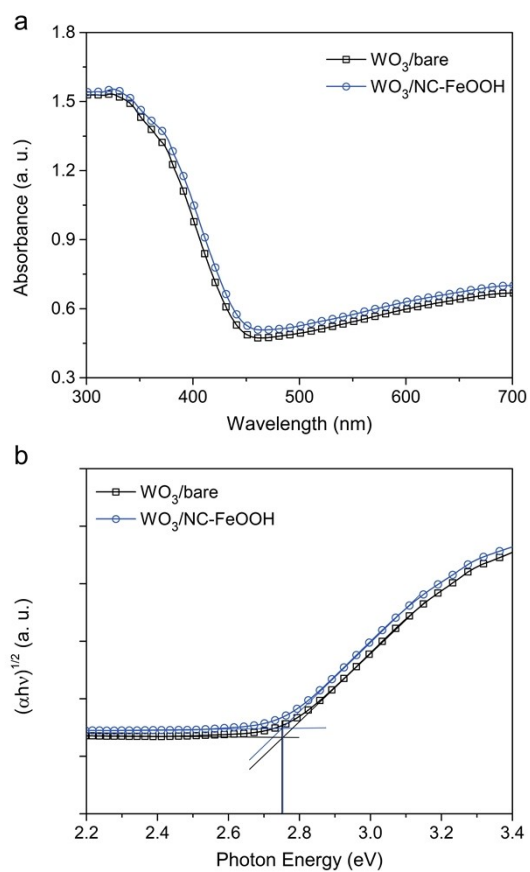

**Figure S1.** UV-Vis spectroscopy. a) Diffuse reflectance absorbance spectra and (b) Tauc plots of  $\text{WO}_3/\text{bare}$  and  $\text{WO}_3/\text{NC-FeOOH}$  samples.

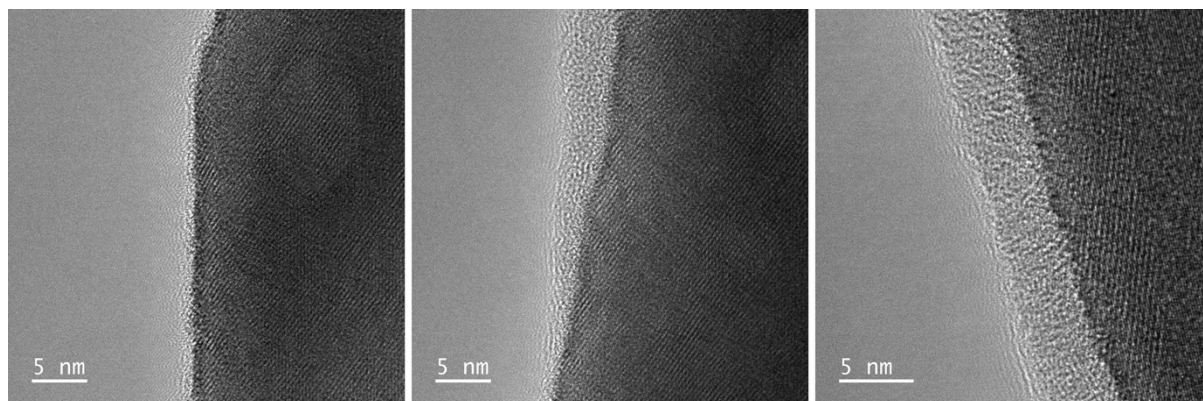

**Figure S2.** HRTEM images of several  $\text{WO}_3/\text{NC-FeOOH}$  samples.

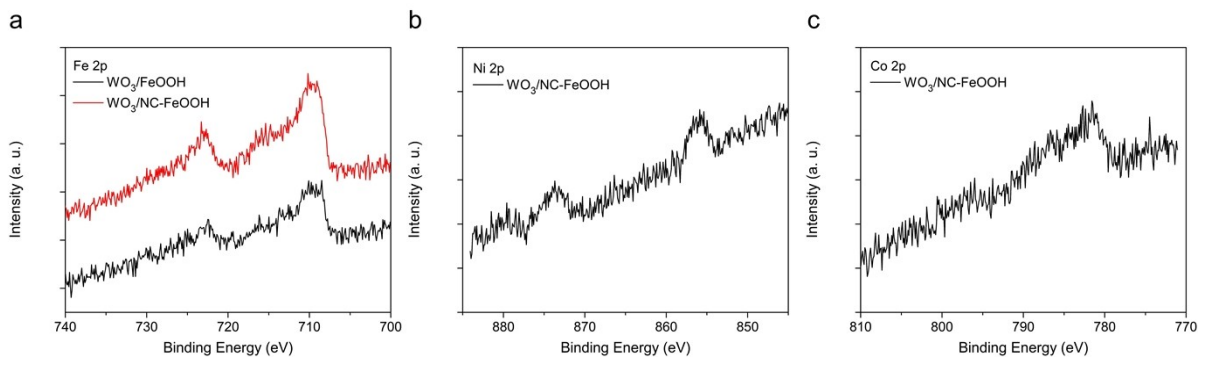

**Figure S3.** XPS core-level spectra of  $\text{WO}_3/\text{FeOOH}$  and  $\text{WO}_3/\text{NC-FeOOH}$  measured in (a) Fe 2p, (b) Ni 2p, and (c) Co 2p region, respectively.

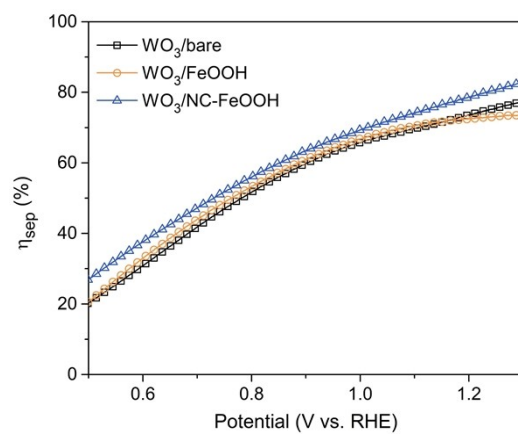

**Figure S4.**  $\eta_{sep}$  of  $WO_3$ /bare,  $WO_3$ /FeOOH, and  $WO_3$ /NC-FeOOH samples.

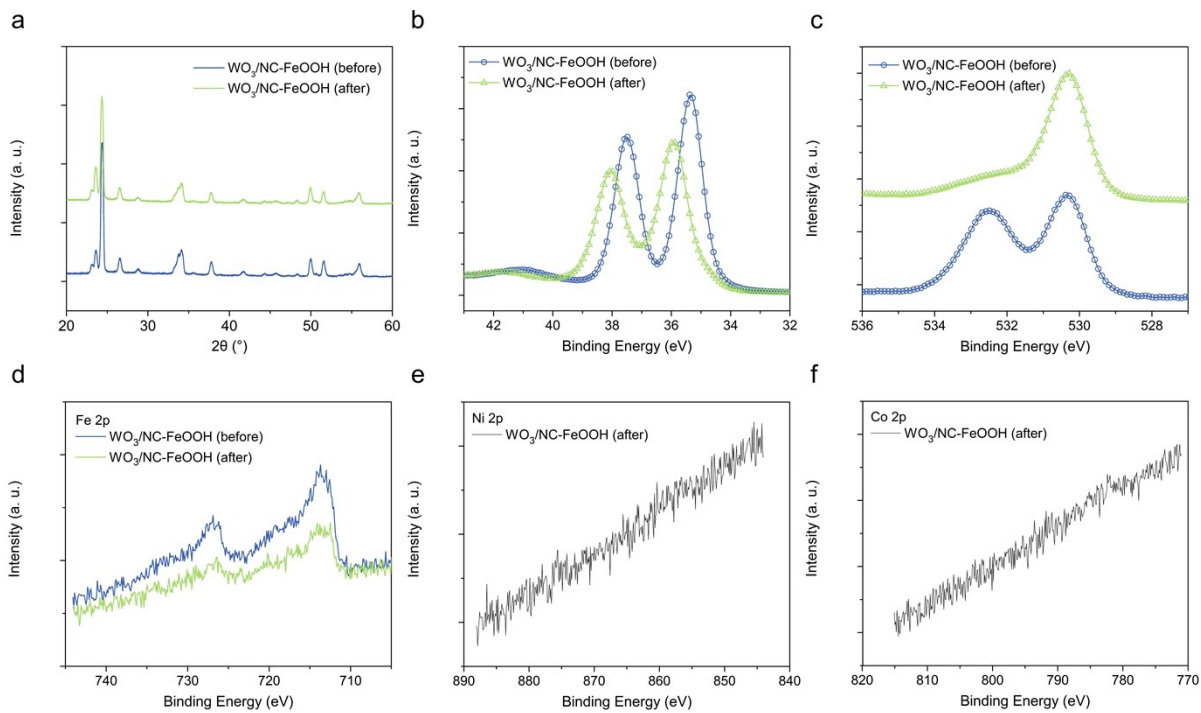

**Figure S5.** (a) XRD patterns, (b) XPS W 4f, (c) O 1s, (d) Fe 2p, (e) Ni 2p, and (f) Co 2p core-level spectra of  $\text{WO}_3/\text{NC-FeOOH}$  before (blue) and after (green) the photostability test for 1 h.

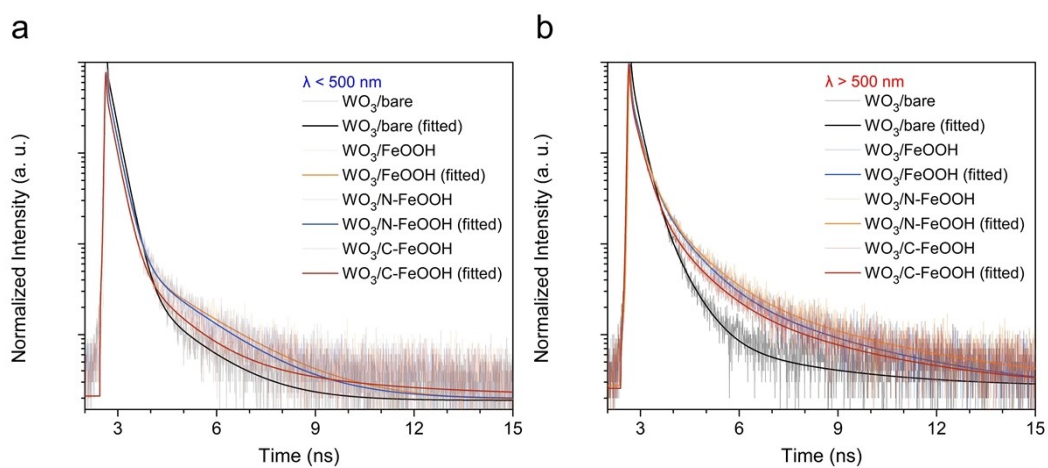

**Figure S6.** TRPL decay profiles of  $\text{WO}_3/\text{bare}$ ,  $\text{WO}_3/\text{FeOOH}$ ,  $\text{WO}_3/\text{N-FeOOH}$ , and  $\text{WO}_3/\text{C-FeOOH}$  measured using (a) SP and (b) LP optical filters.
